# Supplementary material for: Activity of Semi-Synthetic Mulinanes against MDR, Pre-XDR, and XDR Strains of Mycobacterium tuberculosis
Source: MDPI journal article supplement (doi:10.3390/metabo11120876), 2021-12-16
Supplement: s1 [file s1]

Supplementary Materials

# Activity of semi-synthetic mulinanes against susceptible, MDR, pre-XDR, and XDR strains of *Mycobacterium tuberculosis*

María Alejandrina Martínez-González<sup>1,2</sup>, Luis Manuel Peña-Rodríguez<sup>2\*</sup>, Andrés Humberto Uc-Cachón<sup>1</sup>, Jorge Bórquez<sup>3</sup>, Mario J. Simirgiotis<sup>3,4</sup>, Hugo Brígido Barrios-García<sup>5</sup>, Rogelio Hernández-Pando<sup>6</sup>, Luis Alberto Loyola<sup>3</sup>, Carlos Areche<sup>7</sup>, Angel de Jesús Dzul-Beh<sup>1,2</sup>, Jorge Alberto Barrios-Payán<sup>6</sup>, Dulce Mata-Espinosa<sup>6</sup>, Fabiola Escalante-Erosa<sup>2</sup>, Karlina García-Sosa<sup>2</sup> and Gloria María Molina-Salinas<sup>1\*</sup>

<sup>1</sup> Unidad de Investigación Médica Yucatán, Unidad Médica de Alta Especialidad, Hospital de Especialidades 1, Instituto Mexicano del Seguro Social, 97150 Mérida, Yucatán, Mexico; malejandrinamg\_16@hotmail.com; andresuccachon@gmail.com; angeldzulbeh1992@gmail.com; gloria.molinas@imss.gob.mx

<sup>2</sup> Unidad de Biotecnología, Centro de Investigación Científica de Yucatán, A.C., 97205 Mérida, Yucatán, Mexico; lmanuel@cicy.mx; fabiola@cicy.mx; karlina@cicy.mx

<sup>3</sup> Departamento de Química, Facultad de Ciencias Básicas, Universidad de Antofagasta, 02800 Antofagasta, Chile; jorge.borquez@uantof.cl; alberto.loyola@uantof.cl

<sup>4</sup> Instituto de Farmacia, Facultad de Ciencias, Universidad Austral de Chile, 3425 Valdivia, Chile; mario.simirgiotis@gmail.com

<sup>5</sup> Facultad de Medicina Veterinaria y Zootecnia, Universidad Autónoma de Tamaulipas, 87000 Ciudad Victoria, Tamaulipas, Mexico; hbarrios@docentes.uat.edu.mx

<sup>6</sup> Departamento de Patología Experimental, Instituto Nacional de Ciencias Médicas y Nutrición Salvador Zubirán (INCMNSZ), 14080 Ciudad de México, Mexico; rhdezpando@hotmail.com; qcjbp77@yahoo.com.mx; dulmat@yahoo.com.mx

<sup>7</sup> Departamento de Química, Facultad de Ciencias, Universidad de Chile, 1058 Santiago, Chile; areche@uchile.cl

\* Correspondence: to: gloria.molinas@imss.gob.mx (GMM-S) and lmanuel@cicy.mx (LMP-R).

**Table S1.** The  $^1\text{H}$  (400 MHz,  $\text{CDCl}_3$ ),  $^{13}\text{C}$  (100 MHz,  $\text{CDCl}_3$ ), infrared spectroscopy, and mass spectrometry data for compounds 1a, 1b and 1c.

| 1a         |                                            |                                       | 1b                     |                               | 1c                     |                               |
|------------|--------------------------------------------|---------------------------------------|------------------------|-------------------------------|------------------------|-------------------------------|
| Position   | $\delta$ , type                            | $\delta_{\text{H}}$ (J in Hz)         | $\delta$ , type        | $\delta_{\text{H}}$ (J in Hz) | $\delta$ , type        | $\delta_{\text{H}}$ (J in Hz) |
| 1          | 24.00                                      | 1.07 m, 1.47 m                        | 24.41                  | 1.62 m, 2.10 m                | 23.48                  | 1.09 m, 1.52 m                |
| 2          | 28.51                                      | 1.15 m, 1.62 m                        | 29.10                  | 1.57 m, 1.98 m                | 29.84                  | 1.13 m, 1.60 m                |
| 3          | 31.81                                      | 0.85 m                                | 57.36                  | 1.55 m                        | 57.80                  | 0.85 m                        |
| 4          | 48.33                                      | 1.40 m                                | 29.10                  | 1.55 m                        | 31.32                  | 1.41 m                        |
| 5          | 30.10                                      |                                       | 61.29                  |                               | 48.29                  |                               |
| 6          | 39.28                                      | 1.11 m, 2.06 m                        | 31.83                  | 1.44 m, 2.36 m                | 31.58                  | 1.13 m, 2.11 m                |
| 7          | 35.07                                      | 1.18 m, 1.68 m                        | 36.20                  | 1.44 m, 2.70 m                | 39.79                  | 1.20 m, 1.62 m                |
| 8          | 49.36                                      |                                       | 34.89                  |                               | 33.91                  |                               |
| 9          | 54.22                                      | 2.17 m                                | 50.78                  | 2.36 m                        | 48.97                  | 2.13 m                        |
| 10         | 58.16                                      | 1.33 m                                | 54.01                  | 1.77 m                        | 45.36                  | 1.41 m                        |
| 11         | 132.86                                     | 5.62 dd (12.1, 4.3)                   | 132.15                 | 5.54 dd ( 6.5, 12.5)          | 137.09                 | 5.45 m                        |
| 12         | 128.02                                     | 5.46 m                                | 128.38                 | 5.63 d ( 12.5)                | 124.49                 | 5.63 d (12.6)                 |
| 13         | 131.81                                     |                                       | 131.66                 |                               | 137.09                 |                               |
| 14         | 125.73                                     | 5.46 m                                | 125.68                 | 5.45 d (7.4)                  | 124.49                 | 5.45 m                        |
| 15         | 36.48                                      | 1.47 m, 2.73 d (17.2)                 | 40.04                  | 1.44 m, 1.65 m                | 42.89                  | 1.41 m, 2.72 d (17.4)         |
| 16         | 25.79                                      | 1.80 s                                | 26.01                  | 1.79 s                        | 25.20                  | 1.79 s                        |
| 17         | 27.39                                      | 0.88 s                                | 27.14                  | 0.83 s                        | 28.19                  | 0.87 s                        |
| 18         | 23.51                                      | 0.86 d (6.4)                          | 23.22                  | 0.85 d (6.0)                  | 21.22                  | 0.83 d (6.4)                  |
| 19         | 23.40                                      | 1.04 d (6.4)                          | 22.28                  | 0.93 d (6.0)                  | 20.69                  | 1.01 d (6.4)                  |
| 20         | 60.29                                      | 3.79 dd (11.5, 1.2),<br>3.57 d (11.5) | 207.39                 | 9.83 s                        | 62.46                  | 3.93 d (11.7), 4.23 d (11.7)  |
| 21         |                                            |                                       |                        |                               | 171.60                 |                               |
| 22         |                                            |                                       |                        |                               | 23.07                  | 2.06 s                        |
| IR (KBr):  | 3,380 (O-H), 2,944, 2,866 $\text{cm}^{-1}$ |                                       | 1,727 $\text{cm}^{-1}$ |                               | 1,746 $\text{cm}^{-1}$ |                               |
| LREIMS:    | 288 $[\text{M}^+]$                         |                                       | 286 $[\text{M}^+]$     |                               | 330 $[\text{M}^+]$     |                               |
| <i>m/z</i> |                                            |                                       |                        |                               |                        |                               |

**Table S2.** The  $^1\text{H}$  (400 MHz,  $\text{CDCl}_3$ ),  $^{13}\text{C}$  (100 MHz,  $\text{CDCl}_3$ ), infrared spectroscopy, and mass spectrometry data for compounds 2a and 3a.

| 2a            |                                                   |                              | 3a                                         |                                    |
|---------------|---------------------------------------------------|------------------------------|--------------------------------------------|------------------------------------|
| Position      | $\delta_c$ , type                                 | $\delta_H$ (J in Hz)         | $\delta_c$ , type                          | $\delta_H$ (J in Hz)               |
| 1             | 25.14                                             | 1.06 m, 1.53 m               | 28.17                                      | 1.51 m, 1.90 m                     |
| 2             | 28.16                                             | 1.32 m, 1.80 m               | 26.25                                      | 1.36 m, 1.90 m                     |
| 3             | 59.74                                             | 1.17 m                       | 49.44                                      | 1.43 m                             |
| 4             | 31.49                                             | 1.70 m                       | 31.75                                      | 1.43 m                             |
| 5             | 41.10                                             |                              | 58.26                                      |                                    |
| 6             | 29.59                                             | 1.32 m, 2.14 m               | 29.28                                      | 1.12 m, 2.24 m                     |
| 7             | 37.23                                             | 1.26 m, 1.53 m               | 33.45                                      | 1.09 m, 1.17 m                     |
| 8             | 33.93                                             |                              | 37.13                                      |                                    |
| 9             | 41.10                                             | 2.01 m                       | 48.82                                      | 2.44 d (12.4)                      |
| 10            | 51.37                                             | 2.01 m                       | 46.91                                      | 1.74 m                             |
| 11            | 134.57                                            | 5.41 m                       | 132.10                                     | 5.47 dd (10.9, 1.9)                |
| 12            | 137.03                                            | 5.41 m                       |                                            | 5.68 dd (10.9, 2.5)                |
|               |                                                   |                              | 136.93                                     |                                    |
| 13            | 71.56                                             |                              | 71.12                                      |                                    |
| 14            | 36.74                                             | 1.58 m, 2.01 m               | 33.93                                      | 1.59 m, 1.79 m                     |
| 15            | 30.91                                             | 0.88 m, 2.69 m               | 24.31                                      | 1.26 m, 2.09 m                     |
| 16            | 32.61                                             | 1.22 s                       | 29.49                                      | 1.20 s                             |
| 17            | 28.16                                             | 0.93 s                       | 75.18                                      | 3.56 dd (10.0, 1.9), 3.85 d (10.0) |
| 18            | 23.87                                             | 0.80 d (6.3)                 | 23.48                                      | 0.87 d (6.4)                       |
| 19            | 23.85                                             | 0.99 d (6.3)                 | 23.40                                      | 1.05 d (6.4)                       |
| 20            | 59.40                                             | 3.39 d (11.6), 3.67 d (11.6) | 59.56                                      | 3.54 d (11.4), 3.71 d (11.4)       |
| IR (KBr):     | 3,352 (O-H), 2,943, 2,925, 2,855 $\text{cm}^{-1}$ |                              | 3,020 (O-H), 2,923, 2,865 $\text{cm}^{-1}$ |                                    |
| LREIMS: $m/z$ | 306 $[\text{M}^+]$ .                              |                              | 304 $[\text{M}^+]$ .                       |                                    |
